# Supplementary material
Source: PubMed Central journal article supplement (PMC8190321)

**Cordeiro et al.**

High-Intensity Exercise Training Induces Mitonuclear Imbalance and Activates the Mitochondrial Unfolded Protein Response (UPRmt) in Skeletal Muscle of Aged Mice

**WESTERN BLOT SUPPLEMENTARY MATERIAL**  
*Chronic High-Intensity Interval Training (HIIT)*

| Targed Protein |           |          |
|----------------|-----------|----------|
| SDHA           |           |          |
|                |           |          |
| Groups         | Old CTL   | Old HIIT |
| Absoluted Data | 211153    | 301646   |
|                | 274698    | 211630   |
|                | 94900     | 330570   |
|                | 155908    | 246219   |
|                | 258599    |          |
| Average        | 184164,75 | 269732,8 |

| Load Control   |         |          |
|----------------|---------|----------|
| Ponceau        |         |          |
|                |         |          |
| Groups         | Old CTL | Old HIIT |
| Absoluted Data | 39258   | 46285    |
|                | 47632   | 45915    |
|                | 36831   | 45612    |
|                | 46105   | 48492    |
|                |         | 52374    |
| Average        | 42456,5 | 47735,6  |

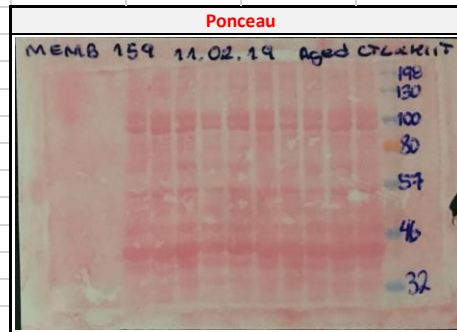

| Unpaired T Test                        |                         |
|----------------------------------------|-------------------------|
| Table Analyzed                         | Mitochondrial Imbalance |
| Column B vs. Column A                  | Aged HIIT vs. Aged CTL  |
| Unpaired t test                        |                         |
| P value                                | 0,0466                  |
| P value summary                        | *                       |
| Significantly different (P < 0.05)?    | Yes                     |
| One- or two-tailed P value?            | Two-tailed              |
| t, df                                  | t=2,413, df=7           |
| How big is the difference?             |                         |
| Mean of column A                       | 100                     |
| Mean of column B                       | 263,3                   |
| Difference between means (B - A) ± SEM | 163,3 ± 67,67           |
| 95% confidence interval                | 3,253 to 323,3          |
| R squared (eta squared)                | 0,454                   |
| F test to compare variances            |                         |
| F, DFn, Dfd                            | 37,01, 4, 3             |
| P value                                | 0,0138                  |
| P value summary                        | *                       |
| Significantly different (P < 0.05)?    | Yes                     |
| Data analyzed                          |                         |
| Sample size, column A                  | 4                       |
| Sample size, column B                  | 5                       |

| Quantitative Relativization (Target / Control) |             |             |
|------------------------------------------------|-------------|-------------|
| Groups                                         | Old CTL     | Old HIIT    |
| Relativization by the Load Control             | 5,378597993 | 6,517143783 |
|                                                | 5,767089352 | 4,609169117 |
|                                                | 2,576633814 | 7,247434886 |
|                                                | 3,381585511 | 5,077517941 |
|                                                |             | 4,937545347 |
| Average                                        | 4,275976667 | 5,677762215 |

| Quantitative normalization (Aged CTL = 100%)                            |             |             |
|-------------------------------------------------------------------------|-------------|-------------|
| Groups                                                                  | Old CTL     | Old HIIT    |
| Normalization by the average from the Load Control (Sample/Average)x100 | 125,7864205 | 152,4129875 |
|                                                                         | 134,871862  | 107,7921952 |
|                                                                         | 60,25836936 | 169,4919184 |
|                                                                         | 79,08334807 | 118,7452209 |
|                                                                         |             | 115,4717561 |
| Average                                                                 | 100         | 132,7828156 |

| UNISCAN Software (Blot Quantification) |             |         |             |
|----------------------------------------|-------------|---------|-------------|
| SDHA                                   |             | Ponceau |             |
| Segment                                | Pixel Total | Segment | Pixel Total |
| 1                                      | 211153      | 1       | 39258       |
| 2                                      | 274698      | 2       | 47632       |
| 3                                      | 94900       | 3       | 36831       |
| 4                                      | 155908      | 4       | 46105       |
| 5                                      | 301646      | 5       | 46285       |
| 6                                      | 211630      | 6       | 45915       |
| 7                                      | 330570      | 7       | 45612       |
| 8                                      | 246219      | 8       | 48492       |
| 9                                      | 258599      | 9       | 52374       |

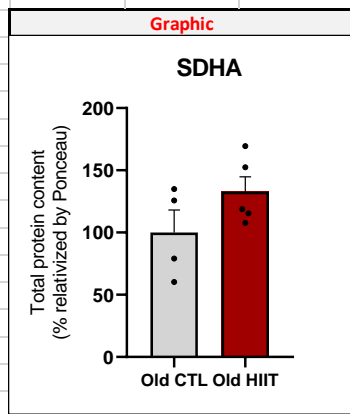

| Targed Protein |         |          |
|----------------|---------|----------|
| MTCO1          |         |          |
|                |         |          |
| Groups         | Old CTL | Old HIIT |
| Absoluted Data | 16680   | 43908    |
|                | 38285   | 63588    |
|                | 11561   | 78618    |
|                | 22124   | 123695   |
|                |         | 158378   |
| Average        | 22162,5 | 93637,4  |

| Load Control   |         |          |
|----------------|---------|----------|
| Ponceau        |         |          |
|                |         |          |
| Groups         | Old CTL | Old HIIT |
| Absoluted Data | 50960   | 54615    |
|                | 56324   | 54623    |
|                | 50958   | 56155    |
|                | 55728   | 55553    |
|                |         | 56378    |
| Average        | 53492,5 | 55464,8  |

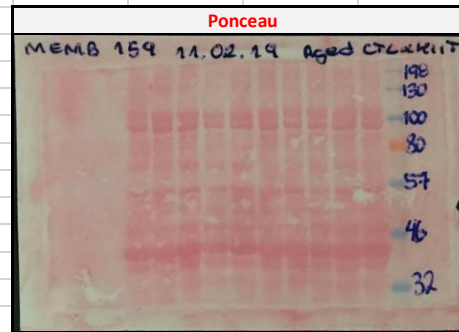

| Unpaired T Test                     |               |
|-------------------------------------|---------------|
| Table Analyzed                      | MTCO1         |
| Column B                            | Old HIIT      |
| vs.                                 | vs.           |
| Column A                            | Old CTL       |
| Unpaired t test                     |               |
| P value                             | 0,0199        |
| P value summary                     | *             |
| Significantly different (P < 0.05)? | Yes           |
| One- or two-tailed P value?         | Two-tailed    |
| t, df                               | t=3,001, df=7 |

| Quantitative Relativization (Target / Control) |             |             |
|------------------------------------------------|-------------|-------------|
| Groups                                         | Old CTL     | Old HIIT    |
| Relativization by the Load Control             | 0,327315542 | 0,803954957 |
|                                                | 0,679728002 | 1,164125002 |
|                                                | 0,226873111 | 1,400017808 |
|                                                | 0,396999713 | 2,226612424 |
|                                                |             | 2,809216361 |
| Average                                        | 0,407729092 | 1,680785311 |

| Quantitative normalization (Aged CTL = 100%)                            |             |             |
|-------------------------------------------------------------------------|-------------|-------------|
| Groups                                                                  | Old CTL     | Old HIIT    |
| Normalization by the average from the Load Control (Sample/Average)x100 | 80,27770106 | 197,1787084 |
|                                                                         | 166,7106948 | 285,5143342 |
|                                                                         | 55,64310118 | 343,3696136 |
|                                                                         | 97,36850293 | 546,1009449 |
|                                                                         |             | 688,990905  |
| Average                                                                 | 100         | 412,2309012 |

| UNISCAN Software (Blot Quantification) |             |         |             |
|----------------------------------------|-------------|---------|-------------|
| MTCO1                                  |             | Ponceau |             |
| Segment                                | Pixel Total | Segment | Pixel Total |
| 1                                      | 16680       | 1       | 50960       |
| 2                                      | 38285       | 2       | 56324       |
| 3                                      | 11561       | 3       | 50958       |
| 4                                      | 22124       | 4       | 55728       |
| 5                                      | 43908       | 5       | 54615       |
| 6                                      | 63588       | 6       | 54623       |
| 7                                      | 78618       | 7       | 56155       |
| 8                                      | 123695      | 8       | 55553       |
| 9                                      | 158378      | 9       | 56378       |

|                                        |                |
|----------------------------------------|----------------|
| How big is the difference?             |                |
| Mean of column A                       | 100            |
| Mean of column B                       | 412,2          |
| Difference between means (B - A) ± SEM | 312,2 ± 104,0  |
| 95% confidence interval                | 66,22 to 558,2 |
| R squared (eta squared)                | 0,5627         |
| F test to compare variances            |                |
| F, DFn, Dfd                            | 17,78, 4, 3    |
| P value                                | 0,0397         |
| P value summary                        | *              |
| Significantly different (P < 0.05)?    | Yes            |
| Data analyzed                          |                |
| Sample size, column A                  | 4              |
| Sample size, column B                  | 5              |

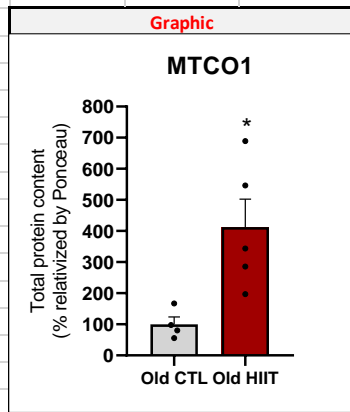

| Mitochondrial-encoded Protein |             |             |
|-------------------------------|-------------|-------------|
| MTCO1                         |             |             |
|                               |             |             |
| Groups                        | Old CTL     | Old HIIT    |
| Absoluted Data                | 0,327315542 | 0,803954957 |
|                               | 0,679728002 | 1,164125002 |
|                               | 0,226873111 | 1,400017808 |
|                               | 0,396999713 | 2,226612424 |
| Average                       | 0,407729092 | 1,680785311 |

| Nuclear-encoded Protein |             |             |
|-------------------------|-------------|-------------|
| SDHA                    |             |             |
|                         |             |             |
| Groups                  | Old CTL     | Old HIIT    |
| Absoluted Data          | 5,378597993 | 6,517143783 |
|                         | 5,767089352 | 4,609169117 |
|                         | 2,576633814 | 7,247434886 |
|                         | 3,381585511 | 5,077517941 |
| Average                 | 4,275976667 | 5,677762215 |

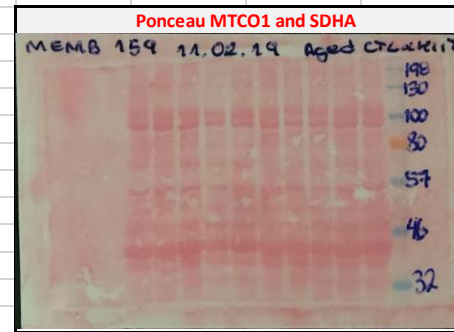

| Unpaired T Test                        |                         |
|----------------------------------------|-------------------------|
| Table Analyzed                         | Mitochondrial Imbalance |
| Column B vs. Column A                  | Aged HIIT vs. Aged CTL  |
| Unpaired t test                        |                         |
| P value                                | 0,0466                  |
| P value summary                        | *                       |
| Significantly different (P < 0.05)?    | Yes                     |
| One- or two-tailed P value?            | Two-tailed              |
| t, df                                  | t=2,413, df=7           |
| How big is the difference?             |                         |
| Mean of column A                       | 100                     |
| Mean of column B                       | 263,3                   |
| Difference between means (B - A) ± SEM | 163,3 ± 67,67           |
| 95% confidence interval                | 3,253 to 323,3          |
| R squared (eta squared)                | 0,454                   |
| F test to compare variances            |                         |
| F, DFn, Dfd                            | 37,01, 4, 3             |
| P value                                | 0,0138                  |
| P value summary                        | *                       |
| Significantly different (P < 0.05)?    | Yes                     |
| Data analyzed                          |                         |
| Sample size, column A                  | 4                       |
| Sample size, column B                  | 5                       |

| Quantitative Relativization (Target / Control) |             |             |
|------------------------------------------------|-------------|-------------|
| Groups                                         | Old CTL     | Old HIIT    |
| Relativization by the Load Control             | 0,060855179 | 0,123360015 |
|                                                | 0,117863269 | 0,252567214 |
|                                                | 0,088050196 | 0,193174251 |
|                                                | 0,117400465 | 0,438523793 |
| Average                                        | 0,096042277 | 0,315315052 |

| Quantitative normalization (Aged CTL = 100%)                            |             |             |
|-------------------------------------------------------------------------|-------------|-------------|
| Groups                                                                  | Old CTL     | Old HIIT    |
| Normalization by the average from the Load Control (Sample/Average)x100 | 63,36290691 | 128,4434513 |
|                                                                         | 122,720194  | 262,9750372 |
|                                                                         | 91,67857971 | 201,1346015 |
|                                                                         | 122,2383194 | 456,5945392 |
| Average                                                                 | 100         | 328,3085966 |

| UNISCAN Software (Blot Quantification) |             |         |             |
|----------------------------------------|-------------|---------|-------------|
| MTCO1                                  |             | SDHA    |             |
| Segment                                | Relativized | Segment | Relativized |
| 1                                      | 0,327315542 | 1       | 5,378597993 |
| 2                                      | 0,679728002 | 2       | 5,767089352 |
| 3                                      | 0,226873111 | 3       | 2,576633814 |
| 4                                      | 0,396999713 | 4       | 3,381585511 |
| 5                                      | 0,803954957 | 5       | 6,517143783 |
| 6                                      | 1,164125002 | 6       | 4,609169117 |
| 7                                      | 1,400017808 | 7       | 7,247434886 |
| 8                                      | 2,226612424 | 8       | 5,077517941 |
| 9                                      | 2,809216361 | 9       | 4,937545347 |

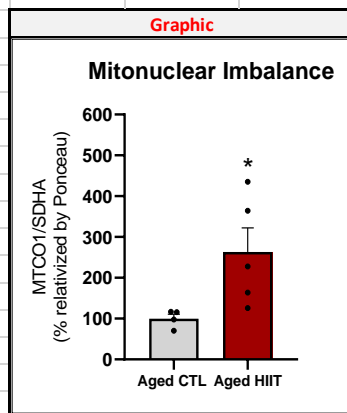

| Targed Protein |          |          |
|----------------|----------|----------|
| Yme1L1         |          |          |
|                |          |          |
| Groups         | Old CTL  | Old HIIT |
| Absoluted Data | 33464    | 67849    |
|                | 47412    | 49283    |
|                | 49398    | 65337    |
|                | 57689    | 53521    |
|                | 35589    |          |
| Average        | 46990,75 | 54315,8  |

| Load Control   |          |          |
|----------------|----------|----------|
| Ponceau        |          |          |
|                |          |          |
| Groups         | Old CTL  | Old HIIT |
| Absoluted Data | 65581    | 64076    |
|                | 62178    | 54744    |
|                | 56048    | 58816    |
|                | 62372    | 66356    |
|                | 59081    |          |
| Average        | 61544,75 | 60614,6  |

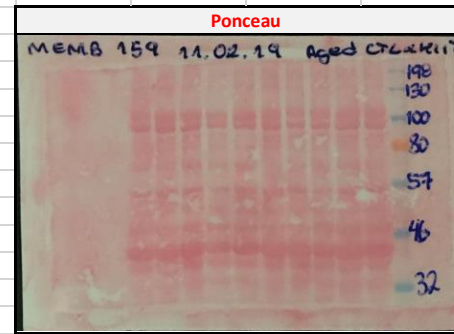

| Unpaired T Test                        |                      |
|----------------------------------------|----------------------|
| Table Analyzed                         | Yme1L1               |
| Column B vs. Column A                  | Old HIIT vs. Old CTL |
| Unpaired t test                        |                      |
| P value                                | 0,3713               |
| P value summary                        | ns                   |
| Significantly different (P < 0.05)?    | No                   |
| One- or two-tailed P value?            | Two-tailed           |
| t, df                                  | t=0,9551, df=7       |
| How big is the difference?             |                      |
| Mean of column A                       | 100                  |
| Mean of column B                       | 116,4                |
| Difference between means (B - A) ± SEM | 16,37 ± 17,14        |
| 95% confidence interval                | -24,16 to 56,91      |
| R squared (eta squared)                | 0,1153               |
| F test to compare variances            |                      |
| F, DFn, Dfd                            | 1,205, 4, 3          |
| P value                                | 0,9147               |
| P value summary                        | ns                   |
| Significantly different (P < 0.05)?    | No                   |
| Data analyzed                          |                      |
| Sample size, column A                  | 4                    |
| Sample size, column B                  | 5                    |

| Quantitative Relativization (Target / Control) |             |             |
|------------------------------------------------|-------------|-------------|
| Groups                                         | Old CTL     | Old HIIT    |
| Relativization by the Load Control             | 0,510269743 | 1,058883201 |
|                                                | 0,762520506 | 0,900244776 |
|                                                | 0,881351699 | 1,110871192 |
|                                                | 0,924918233 | 0,806573633 |
|                                                |             | 0,602376399 |
| Average                                        | 0,769765045 | 0,89578984  |

| Quantitative normalization (Aged CTL = 100%)                            |             |             |
|-------------------------------------------------------------------------|-------------|-------------|
| Groups                                                                  | Old CTL     | Old HIIT    |
| Normalization by the average from the Load Control (Sample/Average)x100 | 66,28902496 | 137,5592732 |
|                                                                         | 99,05886357 | 116,9505918 |
|                                                                         | 114,4961965 | 144,3130211 |
|                                                                         | 120,1559149 | 104,7817952 |
|                                                                         |             | 78,25457944 |
| Average                                                                 | 100         | 116,3718522 |

| UNISCAN Software (Blot Quantification) |             |         |             |
|----------------------------------------|-------------|---------|-------------|
| Yme1L1                                 |             | Ponceau |             |
| Segment                                | Pixel Total | Segment | Pixel Total |
| 1                                      | 33464       | 1       | 65581       |
| 2                                      | 47412       | 2       | 62178       |
| 3                                      | 49398       | 3       | 56048       |
| 4                                      | 57689       | 4       | 62372       |
| 5                                      | 67849       | 5       | 64076       |
| 6                                      | 49283       | 6       | 54744       |
| 7                                      | 65337       | 7       | 58816       |
| 8                                      | 53521       | 8       | 66356       |
| 9                                      | 35589       | 9       | 59081       |

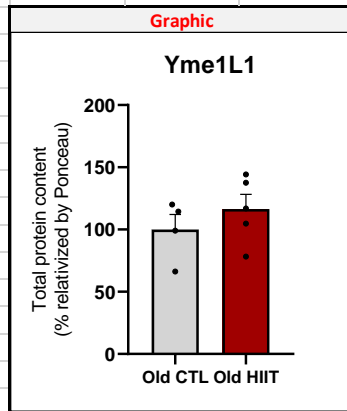

| Targed Protein |          |          |
|----------------|----------|----------|
| Lonp1          |          |          |
|                |          |          |
| Groups         | Old CTL  | Old HIIT |
| Absoluted Data | 34536    | 41163    |
|                | 22532    | 36438    |
|                | 23689    | 41128    |
|                | 33876    | 38543    |
|                |          | 39506    |
| Average        | 28658,25 | 39355,6  |

| Load Control   |          |          |
|----------------|----------|----------|
| Ponceau        |          |          |
|                |          |          |
| Groups         | Old CTL  | Old HIIT |
| Absoluted Data | 48209    | 46662    |
|                | 42289    | 39735    |
|                | 38575    | 48035    |
|                | 45648    | 46575    |
|                |          | 38299    |
| Average        | 43680,25 | 43861,2  |

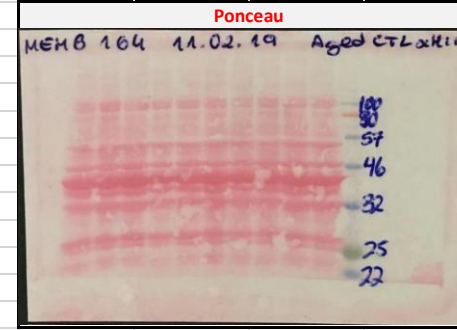

| Unpaired T Test                        |                |
|----------------------------------------|----------------|
| Table Analyzed                         | Lonp1          |
| Column B                               | Old HIIT       |
| vs.                                    | vs,            |
| Column A                               | Old CTL        |
| Unpaired t test                        |                |
| P value                                | 0,0035         |
| P value summary                        | **             |
| Significantly different (P < 0.05)?    | Yes            |
| One- or two-tailed P value?            | Two-tailed     |
| t, df                                  | t=4,312, df=7  |
| How big is the difference?             |                |
| Mean of column A                       | 100            |
| Mean of column B                       | 138,6          |
| Difference between means (B - A) ± SEM | 38,62 ± 8,956  |
| 95% confidence interval                | 17,44 to 59,80 |
| R squared (eta squared)                | 0,7265         |
| F test to compare variances            |                |
| F, DFn, Dfd                            | 1,487, 3, 4    |
| P value                                | 0,6915         |
| P value summary                        | ns             |
| Significantly different (P < 0.05)?    | No             |
| Data analyzed                          |                |
| Sample size, column A                  | 4              |
| Sample size, column B                  | 5              |

| Quantitative Relativization (Target / Control) |             |             |
|------------------------------------------------|-------------|-------------|
| Groups                                         | Old CTL     | Old HIIT    |
| Relativization by the Load Control             | 0,716380759 | 0,882152501 |
|                                                | 0,532809951 | 0,917025293 |
|                                                | 0,614102398 | 0,856209014 |
|                                                | 0,742113565 | 0,827546967 |
|                                                |             | 1,031515183 |
| Average                                        | 0,651351668 | 0,902889792 |

| Quantitative normalization (Aged CTL = 100%)                            |             |             |
|-------------------------------------------------------------------------|-------------|-------------|
| Groups                                                                  | Old CTL     | Old HIIT    |
| Normalization by the average from the Load Control (Sample/Average)x100 | 109,9837145 | 135,4341356 |
|                                                                         | 81,80065804 | 140,788047  |
|                                                                         | 94,28123518 | 131,4511126 |
|                                                                         | 113,9343923 | 127,0507174 |
|                                                                         |             | 158,3653246 |
| Average                                                                 | 100         | 138,6178674 |

| UNISCAN Software (Blot Quantification) |             |         |             |
|----------------------------------------|-------------|---------|-------------|
| Lonp1                                  |             | Ponceau |             |
| Segment                                | Pixel Total | Segment | Pixel Total |
| 1                                      | 34536       | 1       | 48209       |
| 2                                      | 22532       | 2       | 42289       |
| 3                                      | 23689       | 3       | 38575       |
| 4                                      | 33876       | 4       | 45648       |
| 5                                      | 41163       | 5       | 46662       |
| 6                                      | 36438       | 6       | 39735       |
| 7                                      | 41128       | 7       | 48035       |
| 8                                      | 38543       | 8       | 46575       |
| 9                                      | 39506       | 9       | 38299       |

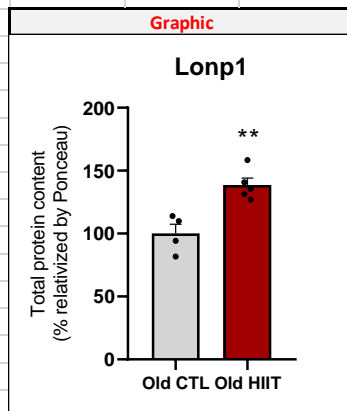

| Targed Protein |          |          |
|----------------|----------|----------|
| CLpP           |          |          |
|                |          |          |
| Groups         | Old CTL  | Old HIIT |
| Absoluted Data | 39150    | 41674    |
|                | 11261    | 12342    |
|                | 12572    | 25526    |
|                | 48748    | 62954    |
|                |          | 61993    |
| Average        | 27932,75 | 40897,8  |

| Load Control   |          |          |
|----------------|----------|----------|
| Ponceau        |          |          |
|                |          |          |
| Groups         | Old CTL  | Old HIIT |
| Absoluted Data | 53778    | 62429    |
|                | 64174    | 51332    |
|                | 59954    | 52019    |
|                | 62883    | 55125    |
|                |          | 49574    |
| Average        | 60197,25 | 54095,8  |

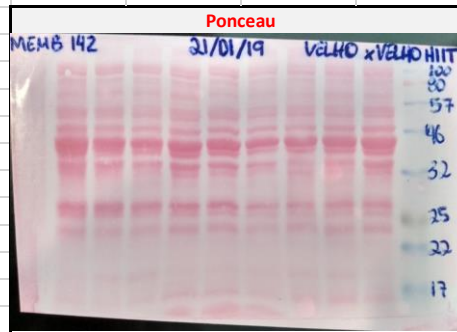

| Unpaired T Test                        |                      |
|----------------------------------------|----------------------|
| Table Analyzed                         | CLpP                 |
| Column B vs. Column A                  | Old HIIT vs. Old CTL |
| Unpaired t test                        |                      |
| P value                                | 0,3075               |
| P value summary                        | ns                   |
| Significantly different (P < 0.05)?    | No                   |
| One- or two-tailed P value?            | Two-tailed           |
| t, df                                  | t=1,100, df=7        |
| How big is the difference?             |                      |
| Mean of column A                       | 100                  |
| Mean of column B                       | 160,6                |
| Difference between means (B - A) ± SEM | 60,61 ± 55,08        |
| 95% confidence interval                | -69,63 to 190,9      |
| R squared (eta squared)                | 0,1475               |
| F test to compare variances            |                      |
| F, DFn, Dfd                            | 1,761, 4, 3          |
| P value                                | 0,6701               |
| P value summary                        | ns                   |
| Significantly different (P < 0.05)?    | No                   |
| Data analyzed                          |                      |
| Sample size, column A                  | 4                    |
| Sample size, column B                  | 5                    |

| Quantitative Relativization (Target / Control) |             |             |
|------------------------------------------------|-------------|-------------|
| Groups                                         | Old CTL     | Old HIIT    |
| Relativization by the Load Control             | 0,72799286  | 0,667542328 |
|                                                | 0,175476049 | 0,240434816 |
|                                                | 0,209694099 | 0,490705319 |
|                                                | 0,775217467 | 1,142022676 |
|                                                |             | 1,250514383 |
| Average                                        | 0,472095119 | 0,758243904 |

| Quantitative normalization (Aged CTL = 100%)                            |             |             |
|-------------------------------------------------------------------------|-------------|-------------|
| Groups                                                                  | Old CTL     | Old HIIT    |
| Normalization by the average from the Load Control (Sample/Average)x100 | 154,2046996 | 141,399964  |
|                                                                         | 37,1696386  | 50,92931634 |
|                                                                         | 44,41776465 | 103,9420447 |
|                                                                         | 164,2078972 | 241,9052073 |
|                                                                         |             | 264,8861072 |
| Average                                                                 | 100         | 160,6125279 |

| UNISCAN Software (Blot Quantification) |             |         |             |
|----------------------------------------|-------------|---------|-------------|
| CLpP                                   |             | Ponceau |             |
| Segment                                | Pixel Total | Segment | Pixel Total |
| 1                                      | 39150       | 1       | 53778       |
| 2                                      | 11261       | 2       | 64174       |
| 3                                      | 12572       | 3       | 59954       |
| 4                                      | 48748       | 4       | 62883       |
| 5                                      | 41674       | 5       | 62429       |
| 6                                      | 12342       | 6       | 51332       |
| 7                                      | 25526       | 7       | 52019       |
| 8                                      | 62954       | 8       | 55125       |
| 9                                      | 61993       | 9       | 49574       |

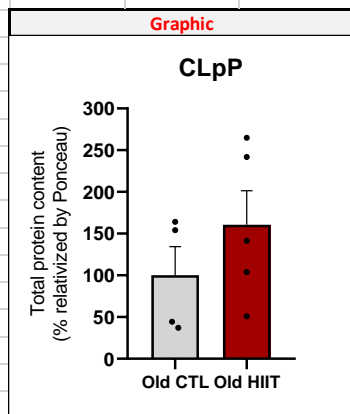

| Targed Protein |          |          |
|----------------|----------|----------|
| GAPDH          |          |          |
|                |          |          |
| Groups         | Old CTL  | Old HIIT |
| Absoluted Data | 74759    | 84143    |
|                | 97171    | 75566    |
|                | 71666    | 69509    |
|                | 73473    | 105461   |
|                |          | 97696    |
| Average        | 79267,25 | 86475    |

| Load Control   |          |          |
|----------------|----------|----------|
| Ponceau        |          |          |
|                |          |          |
| Groups         | Old CTL  | Old HIIT |
| Absoluted Data | 47150    | 51747    |
|                | 57088    | 61337    |
|                | 54027    | 57149    |
|                | 56392    | 54583    |
|                |          | 55276    |
| Average        | 53664,25 | 56018,4  |

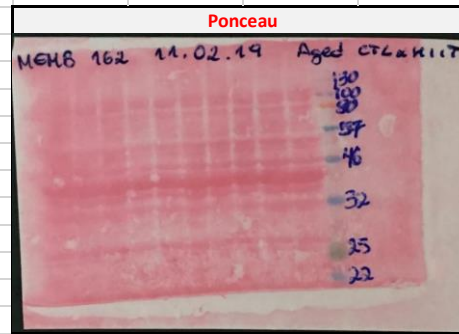

| Unpaired T Test                        |                      |
|----------------------------------------|----------------------|
| Table Analyzed                         | GAPDH                |
| Column B vs. Column A                  | Old HIIT vs. Old CTL |
| Unpaired t test                        |                      |
| P value                                | 0,6939               |
| P value summary                        | ns                   |
| Significantly different (P < 0.05)?    | No                   |
| One- or two-tailed P value?            | Two-tailed           |
| t, df                                  | t=0,4103, df=7       |
| How big is the difference?             |                      |
| Mean of column A                       | 100                  |
| Mean of column B                       | 105,1                |
| Difference between means (B - A) ± SEM | 5,104 ± 12,44        |
| 95% confidence interval                | -24,31 to 34,52      |
| R squared (eta squared)                | 0,02348              |
| F test to compare variances            |                      |
| F, DFn, Dfd                            | 2,674, 4, 3          |
| P value                                | 0,4452               |
| P value summary                        | ns                   |
| Significantly different (P < 0.05)?    | No                   |
| Data analyzed                          |                      |
| Sample size, column A                  | 4                    |
| Sample size, column B                  | 5                    |

| Quantitative Relativization (Target / Control) |             |             |
|------------------------------------------------|-------------|-------------|
| Groups                                         | Old CTL     | Old HIIT    |
| Relativization by the Load Control             | 1,58556734  | 1,626045954 |
|                                                | 1,702126541 | 1,231980697 |
|                                                | 1,326484906 | 1,21627675  |
|                                                | 1,302897574 | 1,932121723 |
|                                                |             | 1,767421666 |
| Average                                        | 1,479266439 | 1,554769358 |

| Quantitative normalization (Aged CTL = 100%)                            |             |             |
|-------------------------------------------------------------------------|-------------|-------------|
| Groups                                                                  | Old CTL     | Old HIIT    |
| Normalization by the average from the Load Control (Sample/Average)x100 | 107,1853381 | 109,9224529 |
|                                                                         | 115,0655823 | 83,28321826 |
|                                                                         | 89,67180428 | 82,2216146  |
|                                                                         | 88,07727533 | 130,6135036 |
|                                                                         |             | 119,4796028 |
| Average                                                                 | 100         | 105,1040784 |

| UNISCAN Software (Blot Quantification) |             |         |             |
|----------------------------------------|-------------|---------|-------------|
| GAPDH                                  |             | Ponceau |             |
| Segment                                | Pixel Total | Segment | Pixel Total |
| 1                                      | 74759       | 1       | 47150       |
| 2                                      | 97171       | 2       | 57088       |
| 3                                      | 71666       | 3       | 54027       |
| 4                                      | 73473       | 4       | 56392       |
| 5                                      | 84143       | 5       | 51747       |
| 6                                      | 75566       | 6       | 61337       |
| 7                                      | 69509       | 7       | 57149       |
| 8                                      | 105461      | 8       | 54583       |
| 9                                      | 97696       | 9       | 55276       |

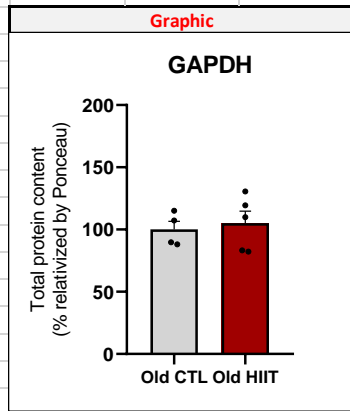



| Targed Protein |           |          |
|----------------|-----------|----------|
| NRF-1          |           |          |
|                |           |          |
| Groups         | Old CTL   | Old HIIT |
| Absoluted Data | 71573     | 199028   |
|                | 194802    | 160169   |
|                | 51302     | 266432   |
|                | 96508     | 154436   |
|                | 204925    |          |
| Average        | 103546,25 | 196998   |

| Load Control   |         |          |
|----------------|---------|----------|
| Ponceau        |         |          |
|                |         |          |
| Groups         | Old CTL | Old HIIT |
| Absoluted Data | 55484   | 58800    |
|                | 56305   | 57189    |
|                | 49734   | 54910    |
|                | 52165   | 58757    |
|                | 52886   |          |
| Average        | 53422   | 56508,4  |

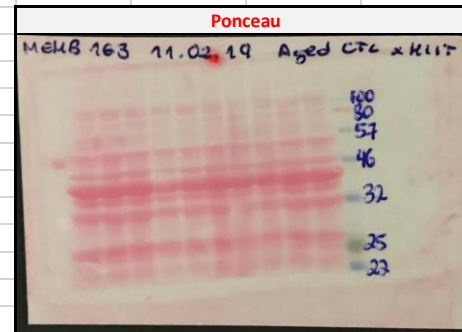

| Unpaired T Test                        |                |
|----------------------------------------|----------------|
| Table Analyzed                         | NRF-1          |
| Column B                               | Old HIIT       |
| vs.                                    | vs.            |
| Column A                               | Old CTL        |
| Unpaired t test                        |                |
| P value                                | 0,046          |
| P value summary                        | *              |
| Significantly different (P < 0.05)?    | Yes            |
| One- or two-tailed P value?            | Two-tailed     |
| t, df                                  | t=2,422, df=7  |
| How big is the difference?             |                |
| Mean of column A                       | 100            |
| Mean of column B                       | 183,9          |
| Difference between means (B - A) ± SEM | 83,88 ± 34,64  |
| 95% confidence interval                | 1,984 to 165,8 |
| R squared (eta squared)                | 0,4559         |
| F test to compare variances            |                |
| F, DFn, Dfd                            | 1,470, 3, 4    |
| P value                                | 0,6988         |
| P value summary                        | ns             |
| Significantly different (P < 0.05)?    | No             |
| Data analyzed                          |                |
| Sample size, column A                  | 4              |
| Sample size, column B                  | 5              |

| Quantitative Relativization (Target / Control) |             |             |
|------------------------------------------------|-------------|-------------|
| Groups                                         | Old CTL     | Old HIIT    |
| Relativization by the Load Control             | 1,289975488 | 3,384829932 |
|                                                | 3,459763787 | 2,800695938 |
|                                                | 1,031527728 | 4,852158077 |
|                                                | 1,850052717 | 2,628384703 |
|                                                | 3,874844004 |             |
| Average                                        | 1,90782993  | 3,508182531 |

| Quantitative normalization (Aged CTL = 100%)                            |             |             |
|-------------------------------------------------------------------------|-------------|-------------|
| Groups                                                                  | Old CTL     | Old HIIT    |
| Normalization by the average from the Load Control (Sample/Average)x100 | 67,61480508 | 177,4178022 |
|                                                                         | 181,3455032 | 146,8000839 |
|                                                                         | 54,06811746 | 254,3286485 |
|                                                                         | 96,97157426 | 137,7682917 |
|                                                                         | 203,1021709 |             |
| Average                                                                 | 100         | 183,8833994 |

| UNISCAN Software (Blot Quantification) |             |         |             |
|----------------------------------------|-------------|---------|-------------|
| NRF-1                                  |             | Ponceau |             |
| Segment                                | Pixel Total | Segment | Pixel Total |
| 1                                      | 71573       | 1       | 55484       |
| 2                                      | 194802      | 2       | 56305       |
| 3                                      | 51302       | 3       | 49734       |
| 4                                      | 96508       | 4       | 52165       |
| 5                                      | 199028      | 5       | 58800       |
| 6                                      | 160169      | 6       | 57189       |
| 7                                      | 266432      | 7       | 54910       |
| 8                                      | 154436      | 8       | 58757       |
| 9                                      | 204925      | 9       | 52886       |

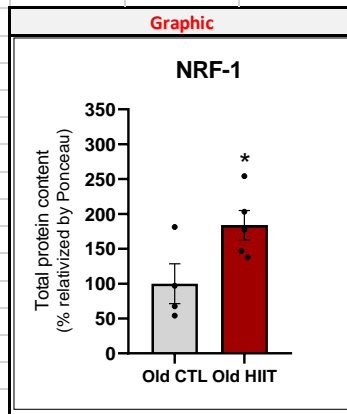

| Targed Protein |          |          |
|----------------|----------|----------|
| TFAM           |          |          |
|                |          |          |
| Groups         | Old CTL  | Old HIIT |
| Absoluted Data | 18761    | 37643    |
|                | 6061     | 27474    |
|                | 12049    | 30981    |
|                | 27282    | 31792    |
| Average        | 16038,25 | 34450    |

| Load Control   |          |          |
|----------------|----------|----------|
| Ponceau        |          |          |
|                |          |          |
| Groups         | Old CTL  | Old HIIT |
| Absoluted Data | 81970    | 72395    |
|                | 77555    | 62663    |
|                | 73927    | 59194    |
|                | 72325    | 60147    |
| Average        | 76444,25 | 62858,4  |

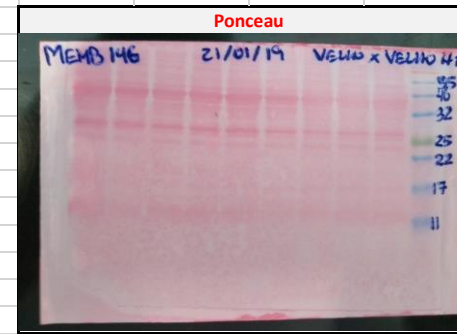

| Unpaired T Test                        |                      |
|----------------------------------------|----------------------|
| Table Analyzed                         | TFAM                 |
| Column B vs. Column A                  | Old HIIT vs. Old CTL |
| Unpaired t test                        |                      |
| P value                                | 0,0038               |
| P value summary                        | **                   |
| Significantly different (P < 0.05)?    | Yes                  |
| One- or two-tailed P value?            | Two-tailed           |
| t, df                                  | t=4,247, df=7        |
| How big is the difference?             |                      |
| Mean of column A                       | 100                  |
| Mean of column B                       | 259,8                |
| Difference between means (B - A) ± SEM | 159,8 ± 37,62        |
| 95% confidence interval                | 70,81 to 248,7       |
| R squared (eta squared)                | 0,7204               |
| F test to compare variances            |                      |
| F, DFn, Dfd                            | 1,256, 3, 4          |
| P value                                | 0,8027               |
| P value summary                        | ns                   |
| Significantly different (P < 0.05)?    | No                   |
| Data analyzed                          |                      |
| Sample size, column A                  | 4                    |
| Sample size, column B                  | 5                    |

| Quantitative Relativization (Target / Control) |             |             |
|------------------------------------------------|-------------|-------------|
| Groups                                         | Old CTL     | Old HIIT    |
| Relativization by the Load Control             | 0,228876418 | 0,519966849 |
|                                                | 0,07815099  | 0,438440547 |
|                                                | 0,162985107 | 0,52380748  |
|                                                | 0,377213965 | 0,528571666 |
| Average                                        | 0,21180662  | 0,550202795 |

| Quantitative normalization (Aged CTL = 100%)                            |             |             |
|-------------------------------------------------------------------------|-------------|-------------|
| Groups                                                                  | Old CTL     | Old HIIT    |
| Normalization by the average from the Load Control (Sample/Average)x100 | 108,059143  | 245,4913113 |
|                                                                         | 36,897331   | 207,0003984 |
|                                                                         | 76,9499589  | 247,1031115 |
|                                                                         | 178,0935671 | 249,5538933 |
| Average                                                                 | 100         | 259,7665718 |

| UNISCAN Software (Blot Quantification) |             |         |             |
|----------------------------------------|-------------|---------|-------------|
| TFAM                                   |             | Ponceau |             |
| Segment                                | Pixel Total | Segment | Pixel Total |
| 1                                      | 18761       | 1       | 81970       |
| 2                                      | 6061        | 2       | 77555       |
| 3                                      | 12049       | 3       | 73927       |
| 4                                      | 27282       | 4       | 72325       |
| 5                                      | 37643       | 5       | 72395       |
| 6                                      | 27474       | 6       | 62663       |
| 7                                      | 30981       | 7       | 59194       |
| 8                                      | 31792       | 8       | 60147       |
| 9                                      | 44360       | 9       | 59893       |

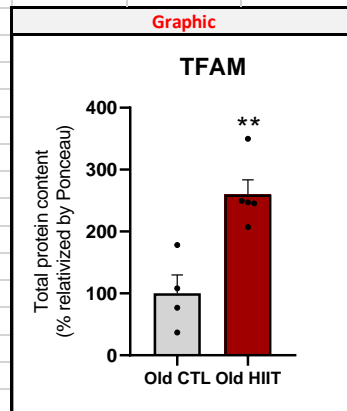

| Targed Protein |           |          |
|----------------|-----------|----------|
| VDAC           |           |          |
|                |           |          |
| Groups         | Old CTL   | Old HIIT |
| Absoluted Data | 95027     | 163457   |
|                | 124672    | 197310   |
|                | 129346    | 187688   |
|                | 145956    | 160611   |
|                | 161007    |          |
| Average        | 123750,25 | 174014,6 |

| Load Control   |          |          |
|----------------|----------|----------|
| Ponceau        |          |          |
|                |          |          |
| Groups         | Old CTL  | Old HIIT |
| Absoluted Data | 25556    | 35875    |
|                | 35940    | 40511    |
|                | 30597    | 39344    |
|                | 35266    | 40983    |
|                |          | 35839    |
| Average        | 31839,75 | 38510,4  |

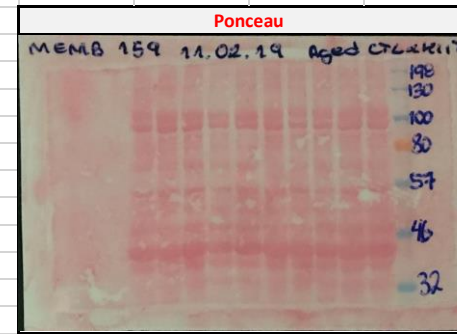

| Unpaired T Test                        |                      |
|----------------------------------------|----------------------|
| Table Analyzed                         | VDAC                 |
| Column B vs. Column A                  | Old HIIT vs. Old CTL |
| Unpaired t test                        |                      |
| P value                                | 0,036                |
| P value summary                        | *                    |
| Significantly different (P < 0.05)?    | Yes                  |
| One- or two-tailed P value?            | Two-tailed           |
| t, df                                  | t=2,589, df=7        |
| How big is the difference?             |                      |
| Mean of column A                       | 100                  |
| Mean of column B                       | 116,3                |
| Difference between means (B - A) ± SEM | 16,29 ± 6,293        |
| 95% confidence interval                | 1,409 to 31,17       |
| R squared (eta squared)                | 0,4891               |
| F test to compare variances            |                      |
| F, DFn, Dfd                            | 1,076, 4, 3          |
| P value                                | 0,9916               |
| P value summary                        | ns                   |
| Significantly different (P < 0.05)?    | No                   |
| Data analyzed                          |                      |
| Sample size, column A                  | 4                    |
| Sample size, column B                  | 5                    |

| Quantitative Relativization (Target / Control) |             |             |
|------------------------------------------------|-------------|-------------|
| Groups                                         | Old CTL     | Old HIIT    |
| Relativization by the Load Control             | 3,718383159 | 4,556292683 |
|                                                | 3,468892599 | 4,870528992 |
|                                                | 4,227407916 | 4,770435136 |
|                                                | 4,138717178 | 3,918966401 |
|                                                |             | 4,492508162 |
| Average                                        | 3,888350213 | 4,521746275 |

| Quantitative normalization (Aged CTL = 100%)                            |             |             |
|-------------------------------------------------------------------------|-------------|-------------|
| Groups                                                                  | Old CTL     | Old HIIT    |
| Normalization by the average from the Load Control (Sample/Average)x100 | 95,62881312 | 117,178043  |
|                                                                         | 89,21245281 | 125,2595246 |
|                                                                         | 108,7198345 | 122,685326  |
|                                                                         | 106,4388996 | 100,7873825 |
|                                                                         |             | 115,5376423 |
| Average                                                                 | 100         | 116,2895837 |

| UNISCAN Software (Blot Quantification) |             |         |             |
|----------------------------------------|-------------|---------|-------------|
| VDAC                                   |             | Ponceau |             |
| Segment                                | Pixel Total | Segment | Pixel Total |
| 1                                      | 95027       | 1       | 25556       |
| 2                                      | 124672      | 2       | 35940       |
| 3                                      | 129346      | 3       | 30597       |
| 4                                      | 145956      | 4       | 35266       |
| 5                                      | 163457      | 5       | 35875       |
| 6                                      | 197310      | 6       | 40511       |
| 7                                      | 187688      | 7       | 39344       |
| 8                                      | 160611      | 8       | 40983       |
| 9                                      | 161007      | 9       | 35839       |

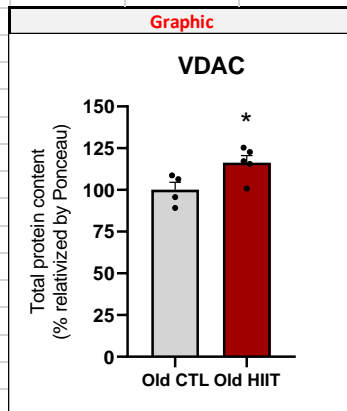

| Targed Protein |         |          |
|----------------|---------|----------|
| TUBULIN        |         |          |
|                |         |          |
| Groups         | Old CTL | Old HIIT |
| Absoluted Data | 78863   | 63001    |
|                | 81998   | 38207    |
|                | 36297   | 55327    |
|                | 57418   | 65814    |
|                |         | 73571    |
| Average        | 63644   | 59184    |

| Load Control   |         |          |
|----------------|---------|----------|
| Ponceau        |         |          |
|                |         |          |
| Groups         | Old CTL | Old HIIT |
| Absoluted Data | 51533   | 59398    |
|                | 58222   | 60790    |
|                | 51326   | 64448    |
|                | 57167   | 64056    |
|                |         | 58251    |
| Average        | 54562   | 61388,6  |

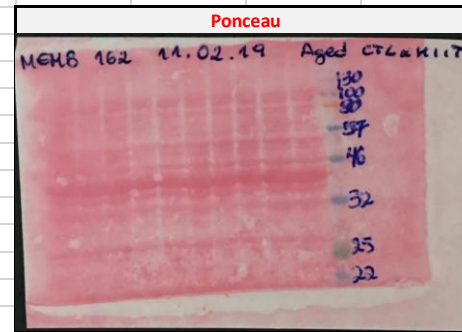

| Unpaired T Test                        |                 |
|----------------------------------------|-----------------|
| Table Analyzed                         | alpha-Tubulin   |
| Column B                               | Old HIIT        |
| vs.                                    | vs.             |
| Column A                               | Old CTL         |
| Unpaired t test                        |                 |
| P value                                | 0,3735          |
| P value summary                        | ns              |
| Significantly different (P < 0.05)?    | No              |
| One- or two-tailed P value?            | Two-tailed      |
| t, df                                  | t=0,9505, df=7  |
| How big is the difference?             |                 |
| Mean of column A                       | 100             |
| Mean of column B                       | 83,23           |
| Difference between means (B - A) ± SEM | -16,77 ± 17,64  |
| 95% confidence interval                | -58,49 to 24,95 |
| R squared (eta squared)                | 0,1143          |
| F test to compare variances            |                 |
| F, DFn, Dfd                            | 2,521, 3, 4     |
| P value                                | 0,3931          |
| P value summary                        | ns              |
| Significantly different (P < 0.05)?    | No              |
| Data analyzed                          |                 |
| Sample size, column A                  | 4               |
| Sample size, column B                  | 5               |

| Quantitative Relativization (Target / Control) |             |             |
|------------------------------------------------|-------------|-------------|
| Groups                                         | Old CTL     | Old HIIT    |
| Relativization by the Load Control             | 1,530339782 | 1,060658608 |
|                                                | 1,408367971 | 0,628507978 |
|                                                | 0,707185442 | 0,85847505  |
|                                                | 1,004390645 | 1,027444736 |
|                                                |             | 1,262999777 |
| Average                                        | 1,16257096  | 0,96761723  |

| Quantitative normalization (Aged CTL = 100%)                            |             |             |
|-------------------------------------------------------------------------|-------------|-------------|
| Groups                                                                  | Old CTL     | Old HIIT    |
| Normalization by the average from the Load Control (Sample/Average)x100 | 131,6340967 | 91,23388116 |
|                                                                         | 121,1425383 | 54,06190245 |
|                                                                         | 60,82944322 | 73,84280867 |
|                                                                         | 86,3939217  | 88,37694826 |
|                                                                         |             | 108,6385107 |
| Average                                                                 | 100         | 83,23081025 |

| UNISCAN Software (Blot Quantification) |             |         |             |
|----------------------------------------|-------------|---------|-------------|
| TUBULIN                                |             | Ponceau |             |
| Segment                                | Pixel Total | Segment | Pixel Total |
| 1                                      | 78863       | 1       | 51533       |
| 2                                      | 81998       | 2       | 58222       |
| 3                                      | 36297       | 3       | 51326       |
| 4                                      | 57418       | 4       | 57167       |
| 5                                      | 63001       | 5       | 59398       |
| 6                                      | 38207       | 6       | 60790       |
| 7                                      | 55327       | 7       | 64448       |
| 8                                      | 65814       | 8       | 64056       |
| 9                                      | 73571       | 9       | 58251       |

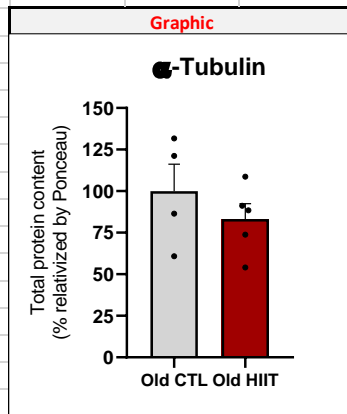

**Cordeiro et al.**

High-Intensity Exercise Training Induces Mitonuclear Imbalance and Activates the Mitochondrial Unfolded Protein Response (UPRmt) in Skeletal Muscle of Aged Mice

**WESTERN BLOT SUPPLEMENTARY MATERIAL**  
*Acute High-Intensity Interval Exercise (HIIE)*

| Targed Protein     |         |          |
|--------------------|---------|----------|
| OXPHOS CIV - MTCO1 |         |          |
|                    |         |          |
| Groups             | Old CTL | Old HIIT |
| Absoluted Data     | 89260   | 80967    |
|                    | 60384   | 86318    |
|                    | 68784   | 77535    |
|                    | 82196   | 77442    |
|                    | 59104   |          |
| Average            | 75156   | 76273,2  |

| Load Control   |          |          |
|----------------|----------|----------|
| Ponceau        |          |          |
|                |          |          |
| Groups         | Old CTL  | Old HIIT |
| Absoluted Data | 20944    | 1942     |
|                | 10618    | 1153     |
|                | 3503     | 1380     |
|                | 5688     | 2441     |
|                |          | 848      |
| Average        | 10188,25 | 1552,8   |

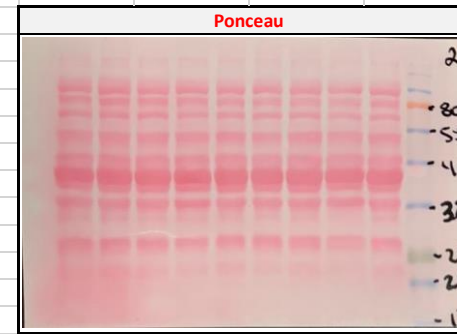

| Unpaired T Test                        |                |
|----------------------------------------|----------------|
| Table Analyzed                         | MTCO1 SuperECL |
| Column B vs. Column A                  | HIIE vs. CTL   |
| Unpaired t test                        |                |
| P value                                | 0,0029         |
| P value summary                        | **             |
| Significantly different (P < 0.05)?    | Yes            |
| One- or two-tailed P value?            | Two-tailed     |
| t, df                                  | t=4,477, df=7  |
| How big is the difference?             |                |
| Mean of column A                       | 100            |
| Mean of column B                       | 498,1          |
| Difference between means (B - A) ± SEM | 398,1 ± 88,92  |
| 95% confidence interval                | 187,8 to 608,4 |
| R squared (eta squared)                | 0,7411         |
| F test to compare variances            |                |
| F, DFn, Dfd                            | 6,233, 4, 3    |
| P value                                | 0,1647         |
| P value summary                        | ns             |
| Significantly different (P < 0.05)?    | No             |
| Data analyzed                          |                |
| Sample size, column A                  | 4              |
| Sample size, column B                  | 5              |

| Quantitative Relativization (Target / Control) |             |             |
|------------------------------------------------|-------------|-------------|
|                                                |             |             |
| Groups                                         | Old CTL     | Old HIIT    |
| Relativization by the Load Control             | 4,2618411   | 41,69258496 |
|                                                | 5,686946694 | 74,86383348 |
|                                                | 19,63574079 | 56,18478261 |
|                                                | 14,45077356 | 31,72552233 |
|                                                |             | 69,69811321 |
| Average                                        | 11,00882554 | 54,83296732 |

| Quantitative normalization (Aged CTL = 100%)                            |             |             |
|-------------------------------------------------------------------------|-------------|-------------|
| Groups                                                                  | Old CTL     | Old HIIT    |
| Normalization by the average from the Load Control (Sample/Average)x100 | 38,71294977 | 378,7196448 |
|                                                                         | 51,65806902 | 680,0346979 |
|                                                                         | 178,3636295 | 510,3612772 |
|                                                                         | 131,2653517 | 288,1826242 |
|                                                                         |             | 633,1112522 |
| Average                                                                 | 100         | 498,0818992 |

| UNISCAN Software (Blot Quantification) |             |         |             |
|----------------------------------------|-------------|---------|-------------|
| OXPHOS CIV - MTCO1                     |             | Ponceau |             |
| Segment                                | Pixel Total | Segment | Pixel Total |
| 1                                      | 89260       | 1       | 20944       |
| 2                                      | 60384       | 2       | 10618       |
| 3                                      | 68784       | 3       | 3503        |
| 4                                      | 82196       | 4       | 5688        |
| 5                                      | 80967       | 5       | 1942        |
| 6                                      | 86318       | 6       | 1153        |
| 7                                      | 77535       | 7       | 1380        |
| 8                                      | 77442       | 8       | 2441        |
| 9                                      | 59104       | 9       | 848         |

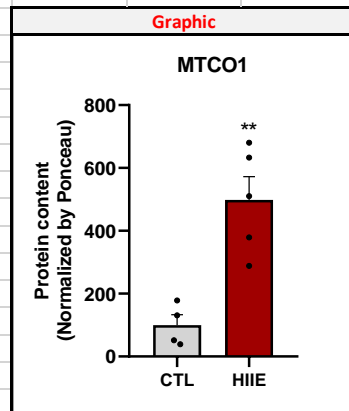

| Targed Protein      |           |          |
|---------------------|-----------|----------|
| OXPHOS (CV) - ATP5a |           |          |
|                     |           |          |
| Groups              | Old CTL   | Old HIIT |
| Absoluted Data      | 159653    | 18078    |
|                     | 117090    | 14323    |
|                     | 81701     | 67810    |
|                     | 76271     | 24625    |
|                     |           | 35427    |
| Average             | 108678,75 | 32052,6  |

| Load Control   |          |          |
|----------------|----------|----------|
| Ponceau        |          |          |
|                |          |          |
| Groups         | Old CTL  | Old HIIT |
| Absoluted Data | 23153    | 2780     |
|                | 13307    | 339      |
|                | 5042     | 1700     |
|                | 4517     | 957      |
|                |          | 1296     |
| Average        | 11504,75 | 1414,4   |



| Unpaired T Test                        |                 |
|----------------------------------------|-----------------|
| Table Analyzed                         | ATP5a SuperECL  |
| Column B vs. Column A                  | HIIE vs. CTL    |
| Unpaired t test                        |                 |
| P value                                | 0,0701          |
| P value summary                        | ns              |
| Significantly different (P < 0.05)?    | No              |
| One- or two-tailed P value?            | Two-tailed      |
| t, df                                  | t=2,135, df=7   |
| How big is the difference?             |                 |
| Mean of column A                       | 100             |
| Mean of column B                       | 232,4           |
| Difference between means (B - A) ± SEM | 132,4 ± 61,99   |
| 95% confidence interval                | -14,21 to 279,0 |
| R squared (eta squared)                | 0,3945          |
| F test to compare variances            |                 |
| F, DFn, Dfd                            | 7,835, 4, 3     |
| P value                                | 0,1223          |
| P value summary                        | ns              |
| Significantly different (P < 0.05)?    | No              |
| Data analyzed                          |                 |
| Sample size, column A                  | 4               |
| Sample size, column B                  | 5               |

| Quantitative Relativization (Target / Control) |             |             |
|------------------------------------------------|-------------|-------------|
|                                                |             |             |
| Groups                                         | Old CTL     | Old HIIT    |
| Relativization by the Load Control             | 6,89556429  | 6,502877698 |
|                                                | 8,799128278 | 42,25073746 |
|                                                | 16,20408568 | 39,88823529 |
|                                                | 16,88532212 | 25,73145246 |
|                                                |             | 27,33564815 |
| Average                                        | 12,19602509 | 28,34179021 |

| Quantitative normalization (Aged CTL = 100%)                            |             |             |
|-------------------------------------------------------------------------|-------------|-------------|
| Groups                                                                  | Old CTL     | Old HIIT    |
| Normalization by the average from the Load Control (Sample/Average)x100 | 56,53944001 | 53,3196484  |
|                                                                         | 72,14750882 | 346,4303914 |
|                                                                         | 132,863663  | 327,0593082 |
|                                                                         | 138,4493881 | 210,9822853 |
|                                                                         |             | 224,1357159 |
| Average                                                                 | 100         | 232,3854699 |

| UNISCAN Software (Blot Quantification) |             |         |             |
|----------------------------------------|-------------|---------|-------------|
| OXPHOS (CV) - ATP5a                    |             | Ponceau |             |
| Segment                                | Pixel Total | Segment | Pixel Total |
| 1                                      | 159653      | 1       | 23153       |
| 2                                      | 117090      | 2       | 13307       |
| 3                                      | 81701       | 3       | 5042        |
| 4                                      | 76271       | 4       | 4517        |
| 5                                      | 18078       | 5       | 2780        |
| 6                                      | 14323       | 6       | 339         |
| 7                                      | 67810       | 7       | 1700        |
| 8                                      | 24625       | 8       | 957         |
| 9                                      | 35427       | 9       | 1296        |

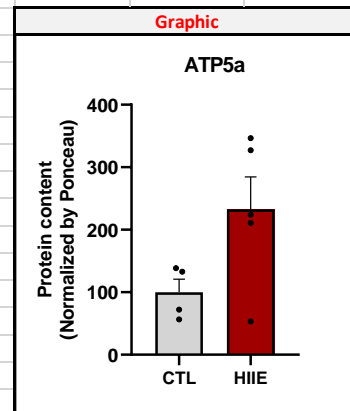

| Targed Protein        |         |          |
|-----------------------|---------|----------|
| Mitonuclear Imbalance |         |          |
|                       |         |          |
| Groups                | Old CTL | Old HIIT |
| Absoluted Data        | 89260   | 80967    |
|                       | 60384   | 86318    |
|                       | 68784   | 77535    |
|                       | 82196   | 77442    |
|                       | 59104   |          |
| Average               | 75156   | 76273,2  |

| Load Control   |           |          |
|----------------|-----------|----------|
| Ponceau        |           |          |
|                |           |          |
| Groups         | Old CTL   | Old HIIT |
| Absoluted Data | 159653    | 18078    |
|                | 117090    | 14323    |
|                | 81701     | 67810    |
|                | 76271     | 24625    |
|                | 35427     |          |
| Average        | 108678,75 | 32052,6  |

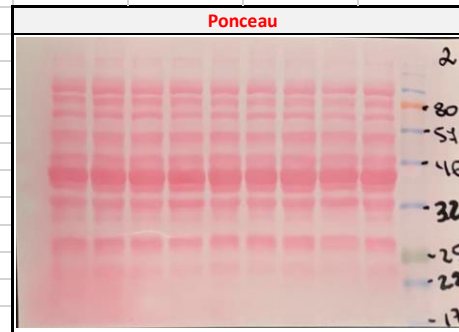

| Unpaired T Test                        |                                |
|----------------------------------------|--------------------------------|
| Table Analyzed                         | Mitonuclear Imbalance SuperFCI |
| Column B vs. Column A                  | HIIE vs. CTL                   |
| Unpaired t test                        |                                |
| P value                                | 0,0422                         |
| P value summary                        | *                              |
| Significantly different (P < 0.05)?    | Yes                            |
| One- or two-tailed P value?            | Two-tailed                     |
| t, df                                  | t=2,480, df=7                  |
| How big is the difference?             |                                |
| Mean of column A                       | 100                            |
| Mean of column B                       | 439,8                          |
| Difference between means (B - A) ± SEM | 339,8 ± 137,0                  |
| 95% confidence interval                | 15,79 to 663,8                 |
| R squared (eta squared)                | 0,4677                         |
| F test to compare variances            |                                |
| F, DFn, Dfd                            | 58,51, 4, 3                    |
| P value                                | 0,0071                         |
| P value summary                        | **                             |
| Significantly different (P < 0.05)?    | Yes                            |
| Data analyzed                          |                                |
| Sample size, column A                  | 4                              |
| Sample size, column B                  | 5                              |

| Quantitative Relativization (Target / Control) |             |             |
|------------------------------------------------|-------------|-------------|
|                                                |             |             |
| Groups                                         | Old CTL     | Old HIIT    |
| Relativization by the Load Control             | 0,559087521 | 4,478758712 |
|                                                | 0,515705867 | 6,026530755 |
|                                                | 0,84189912  | 1,143415425 |
|                                                | 1,077683523 | 3,144852792 |
|                                                |             | 1,668332063 |
| Average                                        | 0,748594008 | 3,292377949 |

| Quantitative normalization (Aged CTL = 100%)                            |             |             |
|-------------------------------------------------------------------------|-------------|-------------|
| Groups                                                                  | Old CTL     | Old HIIT    |
| Normalization by the average from the Load Control (Sample/Average)x100 | 74,68501152 | 598,2894152 |
|                                                                         | 68,88992723 | 805,0466196 |
|                                                                         | 112,4640474 | 152,7417283 |
|                                                                         | 143,9610138 | 420,101251  |
|                                                                         |             | 222,8620648 |
| Average                                                                 | 100         | 439,8082158 |

| UNISCAN Software (Blot Quantification) |             |         |             |
|----------------------------------------|-------------|---------|-------------|
| MTCO1                                  |             | ATP5a   |             |
| Segment                                | Pixel Total | Segment | Pixel Total |
| 1                                      | 89260       | 1       | 159653      |
| 2                                      | 60384       | 2       | 117090      |
| 3                                      | 68784       | 3       | 81701       |
| 4                                      | 82196       | 4       | 76271       |
| 5                                      | 80967       | 5       | 18078       |
| 6                                      | 86318       | 6       | 14323       |
| 7                                      | 77535       | 7       | 67810       |
| 8                                      | 77442       | 8       | 24625       |
| 9                                      | 59104       | 9       | 35427       |

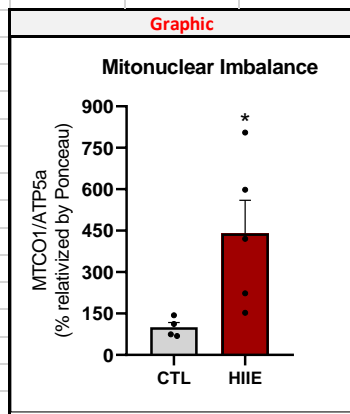



| Targed Protein |          |          |
|----------------|----------|----------|
| GAPDH          |          |          |
|                |          |          |
| Groups         | Old CTL  | Old HIIT |
| Absoluted Data | 146296   | 55823    |
|                | 74486    | 49634    |
|                | 63310    | 73577    |
|                | 45173    | 55659    |
|                |          | 66760    |
| Average        | 82316,25 | 60290,6  |

| Load Control   |          |          |
|----------------|----------|----------|
| Ponceau        |          |          |
|                |          |          |
| Groups         | Old CTL  | Old HIIT |
| Absoluted Data | 52497    | 53827    |
|                | 45203    | 54584    |
|                | 49561    | 61506    |
|                | 45310    | 57712    |
|                |          | 55282    |
| Average        | 48142,75 | 56582,2  |

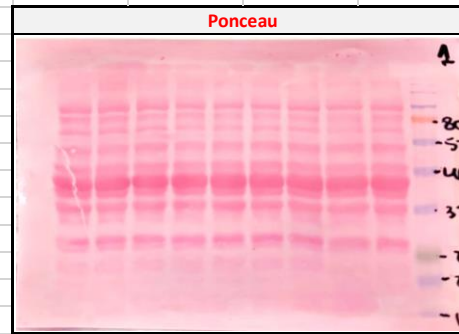

| Unpaired T Test                        |                 |
|----------------------------------------|-----------------|
| Table Analyzed                         | GAPDH Ba        |
| Column B vs. Column A                  | HIIE vs. CTL    |
| Unpaired t test                        |                 |
| P value                                | 0,1245          |
| P value summary                        | ns              |
| Significantly different (P < 0.05)?    | No              |
| One- or two-tailed P value?            | Two-tailed      |
| t, df                                  | t=1,745, df=7   |
| How big is the difference?             |                 |
| Mean of column A                       | 100             |
| Mean of column B                       | 63,37           |
| Difference between means (B - A) ± SEM | -36,63 ± 20,99  |
| 95% confidence interval                | -86,25 to 13,00 |
| R squared (eta squared)                | 0,3032          |
| F test to compare variances            |                 |
| F, DFn, Dfd                            | 34,02, 3, 4     |
| P value                                | 0,0053          |
| P value summary                        | **              |
| Significantly different (P < 0.05)?    | Yes             |
| Data analyzed                          |                 |
| Sample size, column A                  | 4               |
| Sample size, column B                  | 5               |

| Quantitative Relativization (Target / Control) |             |             |
|------------------------------------------------|-------------|-------------|
| Groups                                         | Old CTL     | Old HIIT    |
| Relativization by the Load Control             | 2,786749719 | 1,037081762 |
|                                                | 1,647810986 | 0,909314085 |
|                                                | 1,27741571  | 1,196257276 |
|                                                | 0,996976385 | 0,964426809 |
|                                                |             | 1,207626352 |
| Average                                        | 1,6772382   | 1,062941257 |

| Quantitative normalization (Aged CTL = 100%)                            |             |             |
|-------------------------------------------------------------------------|-------------|-------------|
| Groups                                                                  | Old CTL     | Old HIIT    |
| Normalization by the average from the Load Control (Sample/Average)x100 | 166,1511    | 61,83270581 |
|                                                                         | 98,24549584 | 54,21496391 |
|                                                                         | 76,16185405 | 71,32304021 |
|                                                                         | 59,4415501  | 57,50088503 |
|                                                                         |             | 72,00088528 |
| Average                                                                 | 100         | 63,37449604 |

| UNISCAN Software (Blot Quantification) |             |         |             |
|----------------------------------------|-------------|---------|-------------|
| GAPDH                                  |             | Ponceau |             |
| Segment                                | Pixel Total | Segment | Pixel Total |
| 1                                      | 146296      | 1       | 52497       |
| 2                                      | 74486       | 2       | 45203       |
| 3                                      | 63310       | 3       | 49561       |
| 4                                      | 45173       | 4       | 45310       |
| 5                                      | 55823       | 5       | 53827       |
| 6                                      | 49634       | 6       | 54584       |
| 7                                      | 73577       | 7       | 61506       |
| 8                                      | 55659       | 8       | 57712       |
| 9                                      | 66760       | 9       | 55282       |

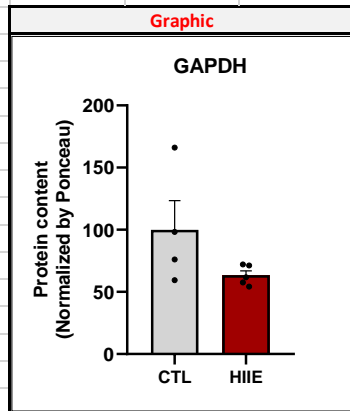

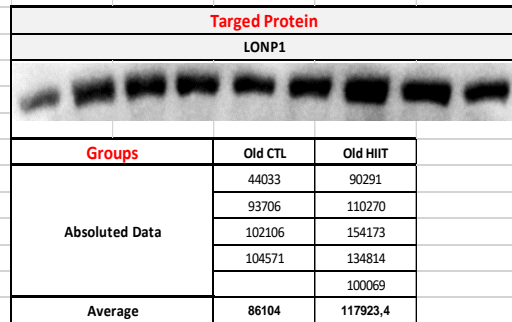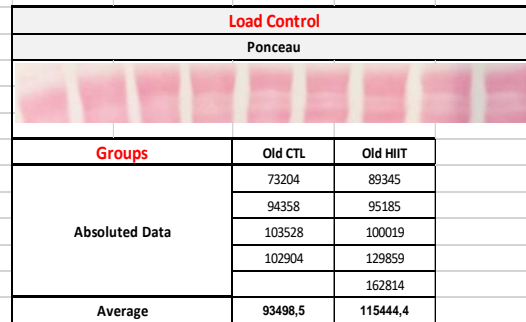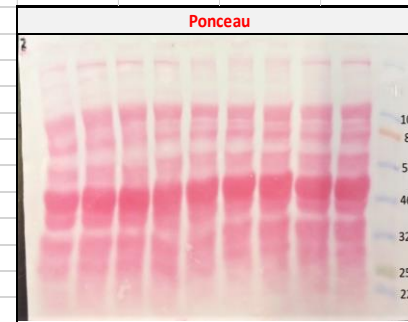

| Unpaired T Test                        |                 |
|----------------------------------------|-----------------|
| Table Analyzed                         | Lonp1           |
| Column B                               | HIIE            |
| vs.                                    | vs,             |
| Column A                               | CTL             |
| Unpaired t test                        |                 |
| P value                                | 0,3915          |
| P value summary                        | ns              |
| Significantly different (P < 0.05)?    | No              |
| One- or two-tailed P value?            | Two-tailed      |
| t, df                                  | t=0,9133, df=7  |
| How big is the difference?             |                 |
| Mean of column A                       | 100             |
| Mean of column B                       | 119,3           |
| Difference between means (B - A) ± SEM | 19,28 ± 21,11   |
| 95% confidence interval                | -30,64 to 69,20 |
| R squared (eta squared)                | 0,1065          |
| F test to compare variances            |                 |
| F, DFn, Dfd                            | 2,792, 4, 3     |
| P value                                | 0,4252          |
| P value summary                        | ns              |
| Significantly different (P < 0.05)?    | No              |
| Data analyzed                          |                 |
| Sample size, column A                  | 4               |
| Sample size, column B                  | 5               |

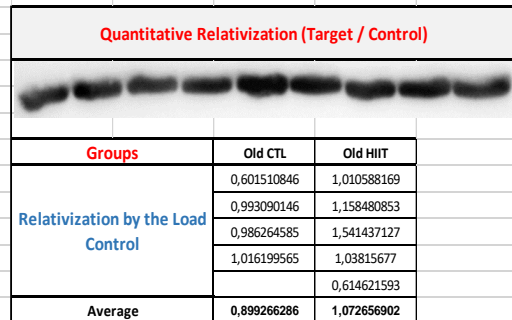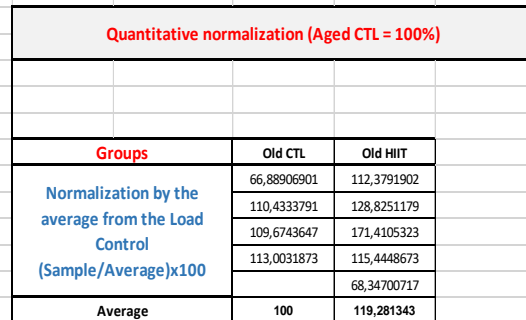

**UNISCAN Software (Blot Quantification)**

| LONP1   |             | Ponceau |             |
|---------|-------------|---------|-------------|
| Segment | Pixel Total | Segment | Pixel Total |
| 1       | 44033       | 1       | 73204       |
| 2       | 93706       | 2       | 94358       |
| 3       | 102106      | 3       | 103528      |
| 4       | 104571      | 4       | 102904      |
| 5       | 90291       | 5       | 89345       |
| 6       | 110270      | 6       | 95185       |
| 7       | 154173      | 7       | 100019      |
| 8       | 134814      | 8       | 129859      |
| 9       | 100069      | 9       | 162814      |

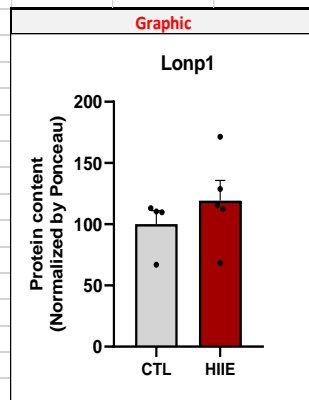

|        | Significant? | P value  | Mean of CTL | Mean of HIIE | Difference | SE of difference | t ratio | df | Adjusted P Value |
|--------|--------------|----------|-------------|--------------|------------|------------------|---------|----|------------------|
| Lonp1  | No           | 0,388107 | 100         | 119,3        | -19,28     | 21,88            | 0,8813  | 21 | 0,388107         |
| CLpP   | Yes          | 0,002857 | 100         | 26,15        | 73,85      | 21,88            | 3,376   | 21 | 0,008546         |
| Yme1L1 | Yes          | 0,005365 | 100         | 167,9        | -67,92     | 21,88            | 3,105   | 21 | 0,0107           |

| Targed Protein |         |          |
|----------------|---------|----------|
| CLPP           |         |          |
|                |         |          |
| Groups         | Old CTL | Old HIIT |
| Absoluted Data | 317318  | 63142    |
|                | 298963  | 89943    |
|                | 188474  | 75482    |
|                | 186889  | 63529    |
|                | 66127   |          |
| Average        | 247911  | 71644,6  |

| Load Control   |          |          |
|----------------|----------|----------|
| Ponceau        |          |          |
|                |          |          |
| Groups         | Old CTL  | Old HIIT |
| Absoluted Data | 16535    | 23757    |
|                | 25247    | 25567    |
|                | 23825    | 25449    |
|                | 22730    | 21399    |
|                |          | 19996    |
| Average        | 22084,25 | 23233,6  |

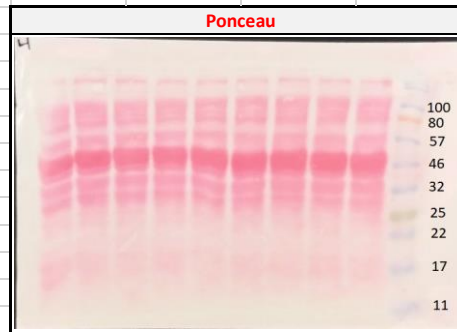

| Unpaired T Test                        |                  |
|----------------------------------------|------------------|
| Table Analyzed                         | CLpP             |
| Column B vs. Column A                  | HIIE vs. CTL     |
| Unpaired t test                        |                  |
| P value                                | 0,007            |
| P value summary                        | **               |
| Significantly different (P < 0.05)?    | Yes              |
| One- or two-tailed P value?            | Two-tailed       |
| t, df                                  | t=3,770, df=7    |
| How big is the difference?             |                  |
| Mean of column A                       | 100              |
| Mean of column B                       | 26,15            |
| Difference between means (B - A) ± SEM | -73,85 ± 19,59   |
| 95% confidence interval                | -120,2 to -27,53 |
| R squared (eta squared)                | 0,67             |
| F test to compare variances            |                  |
| F, DFn, Dfd                            | 246,3, 3, 4      |
| P value                                | 0,0001           |
| P value summary                        | ***              |
| Significantly different (P < 0.05)?    | Yes              |
| Data analyzed                          |                  |
| Sample size, column A                  | 4                |
| Sample size, column B                  | 5                |

| Quantitative Relativization (Target / Control) |             |             |
|------------------------------------------------|-------------|-------------|
|                                                |             |             |
| Groups                                         | Old CTL     | Old HIIT    |
| Relativization by the Load Control             | 19,19068642 | 2,657827167 |
|                                                | 11,84152573 | 3,517933273 |
|                                                | 7,910766002 | 2,966010452 |
|                                                | 8,222129344 | 2,968783588 |
|                                                |             | 3,307011402 |
| Average                                        | 11,79127687 | 3,083513177 |

| Quantitative normalization (Aged CTL = 100%)                            |             |             |
|-------------------------------------------------------------------------|-------------|-------------|
| Groups                                                                  | Old CTL     | Old HIIT    |
| Normalization by the average from the Load Control (Sample/Average)x100 | 162,7532508 | 22,54062215 |
|                                                                         | 100,4261528 | 29,83504934 |
|                                                                         | 67,08998599 | 25,15427705 |
|                                                                         | 69,73061045 | 25,17779558 |
|                                                                         |             | 28,04625349 |
| Average                                                                 | 100         | 26,15079952 |

| UNISCAN Software (Blot Quantification) |             |         |             |
|----------------------------------------|-------------|---------|-------------|
| CLPP                                   |             | Ponceau |             |
| Segment                                | Pixel Total | Segment | Pixel Total |
| 1                                      | 317318      | 1       | 16535       |
| 2                                      | 298963      | 2       | 25247       |
| 3                                      | 188474      | 3       | 23825       |
| 4                                      | 186889      | 4       | 22730       |
| 5                                      | 63142       | 5       | 23757       |
| 6                                      | 89943       | 6       | 25567       |
| 7                                      | 75482       | 7       | 25449       |
| 8                                      | 63529       | 8       | 21399       |
| 9                                      | 66127       | 9       | 19996       |

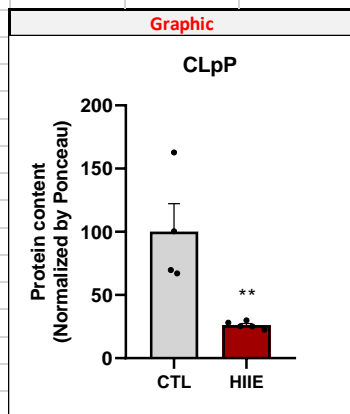

| Targed Protein |         |          |
|----------------|---------|----------|
| YME1L1         |         |          |
|                |         |          |
| Groups         | Old CTL | Old HIIT |
| Absoluted Data | 56035   | 71090    |
|                | 39839   | 85806    |
|                | 46563   | 81761    |
|                | 47341   | 71502    |
|                |         | 66518    |
| Average        | 47444,5 | 75335,4  |

| Load Control   |         |          |
|----------------|---------|----------|
| Ponceau        |         |          |
|                |         |          |
| Groups         | Old CTL | Old HIIT |
| Absoluted Data | 92321   | 62207    |
|                | 91905   | 65384    |
|                | 82249   | 88984    |
|                | 69009   | 96254    |
|                |         | 95660    |
| Average        | 83871   | 81697,8  |

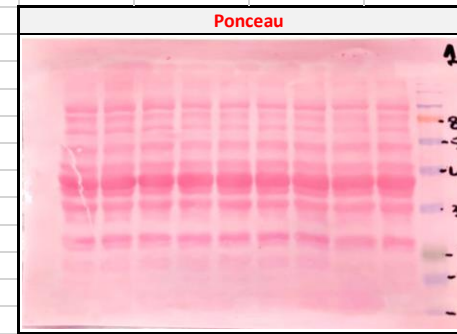

| Unpaired T Test                        |                |
|----------------------------------------|----------------|
| Table Analyzed                         | Yme1L1 Ba      |
| Column B vs. Column A                  | HIIE vs. CTL   |
| Unpaired t test                        |                |
| P value                                | 0,0282         |
| P value summary                        | *              |
| Significantly different (P < 0.05)?    | Yes            |
| One- or two-tailed P value?            | Two-tailed     |
| t, df                                  | t=2,758, df=7  |
| How big is the difference?             |                |
| Mean of column A                       | 100            |
| Mean of column B                       | 167,9          |
| Difference between means (B - A) ± SEM | 67,92 ± 24,62  |
| 95% confidence interval                | 9,694 to 126,2 |
| R squared (eta squared)                | 0,5208         |
| F test to compare variances            |                |
| F, DFn, Dfd                            | 6,200, 4, 3    |
| P value                                | 0,1658         |
| P value summary                        | ns             |
| Significantly different (P < 0.05)?    | No             |
| Data analyzed                          |                |
| Sample size, column A                  | 4              |
| Sample size, column B                  | 5              |

| Quantitative Relativization (Target / Control) |             |             |
|------------------------------------------------|-------------|-------------|
|                                                |             |             |
| Groups                                         | Old CTL     | Old HIIT    |
| Relativization by the Load Control             | 0,60695833  | 1,142797434 |
|                                                | 0,433480224 | 1,31233941  |
|                                                | 0,566122384 | 0,918828104 |
|                                                | 0,686011969 | 0,742847051 |
|                                                |             | 0,695358562 |
| Average                                        | 0,573143227 | 0,962434112 |

| Quantitative normalization (Aged CTL = 100%)                            |             |             |
|-------------------------------------------------------------------------|-------------|-------------|
| Groups                                                                  | Old CTL     | Old HIIT    |
| Normalization by the average from the Load Control (Sample/Average)x100 | 105,8999394 | 199,3912482 |
|                                                                         | 75,63209398 | 228,9723316 |
|                                                                         | 98,77502825 | 160,3138728 |
|                                                                         | 119,6929384 | 129,609322  |
|                                                                         |             | 121,3236986 |
| Average                                                                 | 100         | 167,9220946 |

| UNISCAN Software (Blot Quantification) |             |         |             |
|----------------------------------------|-------------|---------|-------------|
| YME1L1                                 |             | Ponceau |             |
| Segment                                | Pixel Total | Segment | Pixel Total |
| 1                                      | 56035       | 1       | 92321       |
| 2                                      | 39839       | 2       | 91905       |
| 3                                      | 46563       | 3       | 82249       |
| 4                                      | 47341       | 4       | 69009       |
| 5                                      | 71090       | 5       | 62207       |
| 6                                      | 85806       | 6       | 65384       |
| 7                                      | 81761       | 7       | 88984       |
| 8                                      | 71502       | 8       | 96254       |
| 9                                      | 66518       | 9       | 95660       |

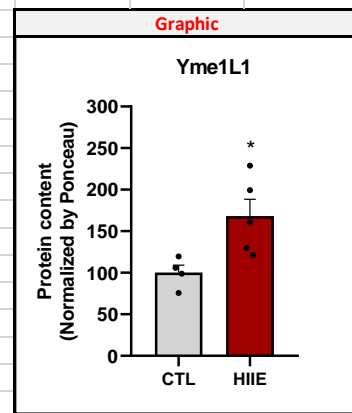

| Targed Protein                                                                    |         |          |
|-----------------------------------------------------------------------------------|---------|----------|
| GAPDH                                                                             |         |          |
| 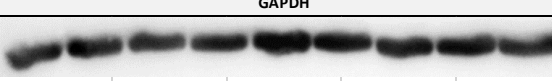 |         |          |
| Groups                                                                            | Old CTL | Old HIIT |
| Absoluted Data                                                                    | 390715  | 507954   |
|                                                                                   | 422262  | 430136   |
|                                                                                   | 359453  | 403913   |
|                                                                                   | 378362  | 441140   |
|                                                                                   | 417843  | 417843   |
| Average                                                                           | 387698  | 440197,2 |

| Load Control                                                                       |         |          |
|------------------------------------------------------------------------------------|---------|----------|
| Ponceau                                                                            |         |          |
|  |         |          |
| Groups                                                                             | Old CTL | Old HIIT |
| Absoluted Data                                                                     | 104769  | 166834   |
|                                                                                    | 136230  | 169032   |
|                                                                                    | 154369  | 171117   |
|                                                                                    | 160248  | 165588   |
|                                                                                    | 151419  | 151419   |
| Average                                                                            | 138904  | 164798   |

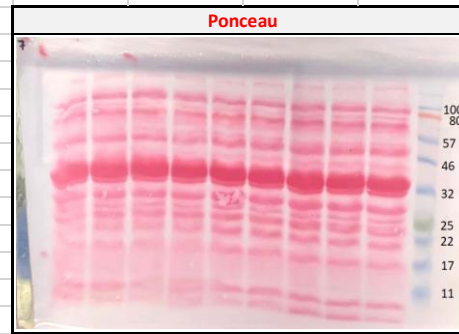

| Unpaired T Test                        |                 |
|----------------------------------------|-----------------|
| Table Analyzed                         | GAPDH           |
| Column B vs. Column A                  | HIIE vs. CTL    |
| Unpaired t test                        |                 |
| P value                                | 0,5435          |
| P value summary                        | ns              |
| Significantly different (P < 0.05)?    | No              |
| One- or two-tailed P value?            | Two-tailed      |
| t, df                                  | t=0,6385, df=7  |
| How big is the difference?             |                 |
| Mean of column A                       | 100             |
| Mean of column B                       | 92,88           |
| Difference between means (B - A) ± SEM | -7,117 ± 11,15  |
| 95% confidence interval                | -33,48 to 19,24 |
| R squared (eta squared)                | 0,05504         |
| F test to compare variances            |                 |
| F, DFn, Dfd                            | 6,891, 3, 4     |
| P value                                | 0,0931          |
| P value summary                        | ns              |
| Significantly different (P < 0.05)?    | No              |
| Data analyzed                          |                 |
| Sample size, column A                  | 4               |
| Sample size, column B                  | 5               |

| Quantitative Relativization (Target / Control)                                    |             |             |
|-----------------------------------------------------------------------------------|-------------|-------------|
|  |             |             |
| Groups                                                                            | Old CTL     | Old HIIT    |
| Relativization by the Load Control                                                | 3,729299697 | 3,044667154 |
|                                                                                   | 3,099625633 | 2,544701595 |
|                                                                                   | 2,328530987 | 2,360449283 |
|                                                                                   | 2,361102791 | 2,664081938 |
|                                                                                   |             | 2,759514988 |
| Average                                                                           | 2,879639777 | 2,674682992 |

| Quantitative normalization (Aged CTL = 100%)                                       |             |             |
|------------------------------------------------------------------------------------|-------------|-------------|
| 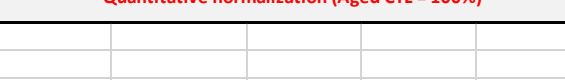 |             |             |
| Groups                                                                             | Old CTL     | Old HIIT    |
| Normalization by the average from the Load Control (Sample/Average)x100            | 129,5057711 | 105,7308341 |
|                                                                                    | 107,6393533 | 88,3687472  |
|                                                                                    | 80,86188439 | 81,97029719 |
|                                                                                    | 81,99299126 | 92,51441654 |
|                                                                                    |             | 95,82847862 |
| Average                                                                            | 100         | 92,88255472 |

| UNISCAN Software (Blot Quantification) |             |         |             |
|----------------------------------------|-------------|---------|-------------|
| GAPDH                                  |             | Ponceau |             |
| Segment                                | Pixel Total | Segment | Pixel Total |
| 1                                      | 390715      | 1       | 104769      |
| 2                                      | 422262      | 2       | 136230      |
| 3                                      | 359453      | 3       | 154369      |
| 4                                      | 378362      | 4       | 160248      |
| 5                                      | 507954      | 5       | 166834      |
| 6                                      | 430136      | 6       | 169032      |
| 7                                      | 403913      | 7       | 171117      |
| 8                                      | 441140      | 8       | 165588      |
| 9                                      | 417843      | 9       | 151419      |

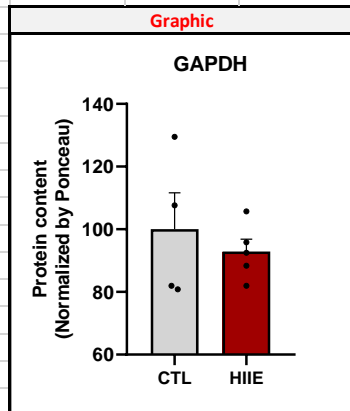

Supplement: 11357_2020_246_MOESM4_ESM.pdf [file 11357_2020_246_MOESM4_ESM.pdf]
