# Supplementary material
Source: PubMed Central journal article supplement (PMC8190321)
Supplement: 11357_2020_246_MOESM5_ESM.pdf [file 11357_2020_246_MOESM5_ESM.pdf]

**Supplementary Table 1.** Protocol description of High-Intensity Interval Training (HIIT).

| <b>Weeks</b> | <b>Warm up /<br/>Cool Down<br/>(min)</b> | <b>Exercise<br/>Intensity<br/>(%LT)</b> | <b>Number of<br/>Bouts</b> | <b>Bout duration<br/>(sec)</b> | <b>Active Rest<br/>(8m/min)<br/>(sec)</b> | <b>Total Volume per<br/>session (min)</b> |
|--------------|------------------------------------------|-----------------------------------------|----------------------------|--------------------------------|-------------------------------------------|-------------------------------------------|
| <b>1</b>     | 5 / 5                                    | 75                                      | 10                         | 120                            | 60                                        | 40                                        |
| <b>2</b>     | 5 / 5                                    | 80                                      | 10                         | 120                            | 60                                        | 40                                        |
| <b>3</b>     | 5 / 5                                    | 85                                      | 10                         | 120                            | 60                                        | 40                                        |
| <b>4</b>     | 5 / 5                                    | 90                                      | 10                         | 120                            | 60                                        | 40                                        |
