# Supplementary material
Source: PubMed Central journal article supplement (PMC8190321)
Supplement: 11357_2020_246_MOESM6_ESM.pdf [file 11357_2020_246_MOESM6_ESM.pdf]

**Supplementary Table 2.** Primers sequence designed for RT-qPCR analysis in muscle of aged mice.

| <b>PRIMER</b>           | <b>Forward Transcription</b> | <b>Reverse Transcription</b> | <b>GeneBank Code (Assay ID N°)</b> |
|-------------------------|------------------------------|------------------------------|------------------------------------|
| <b>Citrate Synthase</b> | TCCATCACAGCGGCGAC            | AGGATGAGTTCTTGGCTCCC         | NM_026444.3                        |
| <b>NRF-1</b>            | GCACCTTTGGAGAATGTGGT         | GGGTCATTTTGTCCACAGAGA        | NM_010938.4                        |
| <b>Tfam</b>             | CCTTCGATTTTCCACAGAACA        | GCTCACAGCTTCTTTGTATGCTT      | NM_009360.4                        |
| <b>CLpP</b>             | GCCATTCAGTCCCAATTCC          | TGCTGACTCGATCACCTGTAG        | NM_017393.2                        |
| <b>Lonp1</b>            | AGCCCTATGTTGGCGTCTTC         | CCGGCTGATGTGAATCCTTCT        | NM_028782.2                        |
| <b>Yme111</b>           | GCTAAGAAGCAGTTTCGGCT         | GAGAGGAATTGTAACCTGAGGC       | NM_013771.5                        |
| <b>GAPDH</b>            | AGGTCGGTGTGAACGGATTTG        | TGTAGACCATGTAGTTGAGGTCA      | NM_001289726.1                     |
