# Supplementary material
Source: PubMed Central journal article supplement (PMC8190321)
Supplement: 11357_2020_246_MOESM7_ESM.pdf [file 11357_2020_246_MOESM7_ESM.pdf]

**Supplementary Table 3.** Primers of mitochondrial-encoded genes design and characteristics.

| <b>PRIMER</b>    | <b>Forward Transcription</b> | <b>Reverse Transcription</b> | <b>RNA Source</b> |
|------------------|------------------------------|------------------------------|-------------------|
| <b>mt-D-Loop</b> | GGCCATTAAACTTGGGGGT          | TTCTTCACCGTAGGTGCGTC         | Mouse             |
| <b>mt-Nd1</b>    | CGTCCCCATTCTAATCGCCA         | ATGGCGTCTGCAAATGGTTG         | Mouse             |
| <b>mt-CytB</b>   | CTTCATGTCGGACGAGGCTT         | CCTCATGGAAGGACGTAGCC         | Mouse             |
| <b>Rpl13a</b>    | GGAGTCCGTTGGTCTTGAGG         | GGCCAAGATGCACTATCGGA         | Mouse             |
