# Supplementary material
Source: PubMed Central journal article supplement (PMC8190321)

# Supplementary Appendix 2.

Aged  
 Aged + HIIE

**A.**

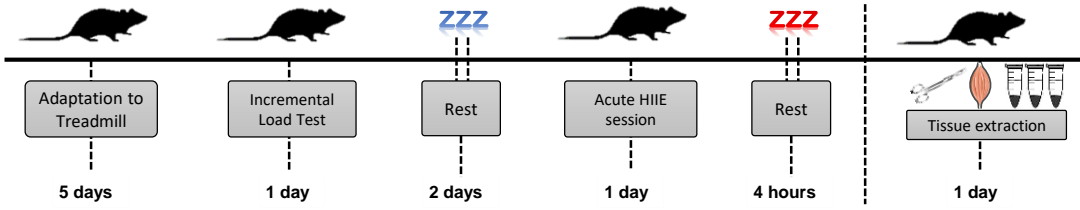

**B.**

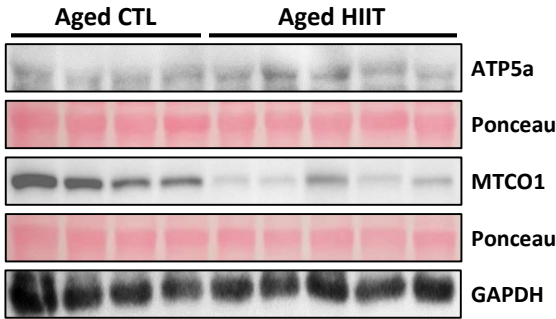

**Mitonuclear Imbalance**

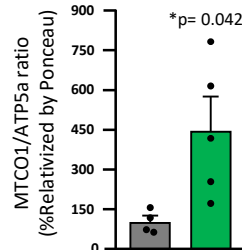

**C.**

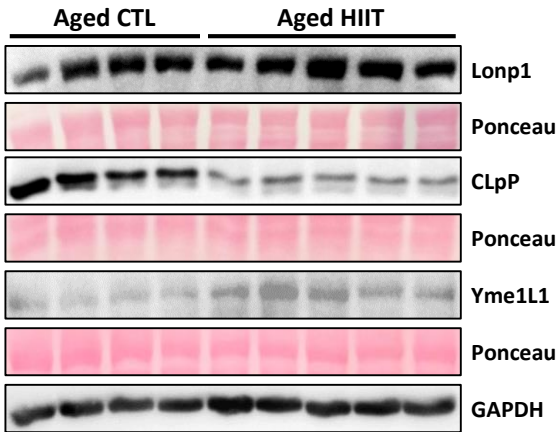

**Markers of UPRmt**

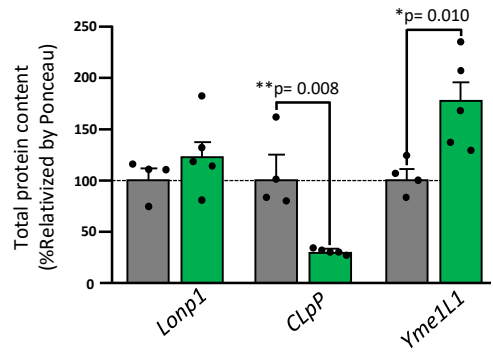

Supplement: 11357_2020_246_MOESM2_ESM.pdf [file 11357_2020_246_MOESM2_ESM.pdf]

# Appendix A3.

**A.**

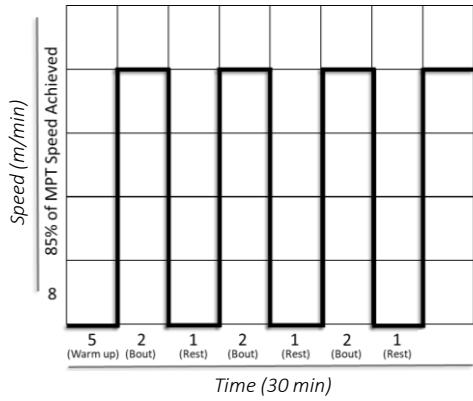

**B.**

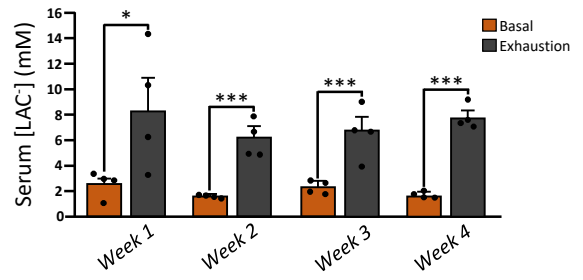

**C.**

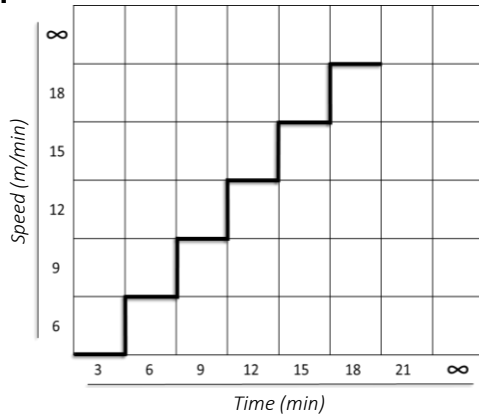

**D.**

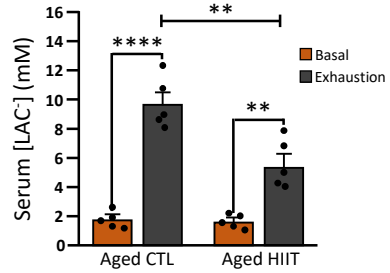

Supplement: 11357_2020_246_MOESM3_ESM.pdf [file 11357_2020_246_MOESM3_ESM.pdf]
